# Supplementary material
Source: PubMed Central journal article supplement (PMC5360514)
Supplement: NIHMS846930-supplement-1.pdf [file NIHMS846930-supplement-1.pdf]

## Online Supplement

**OGG-1 regulates inflammatory responses to hyperoxia in the lung by interacting with Atg**

**7**

Yan Ye, et al

## Supplementary Figures and legends

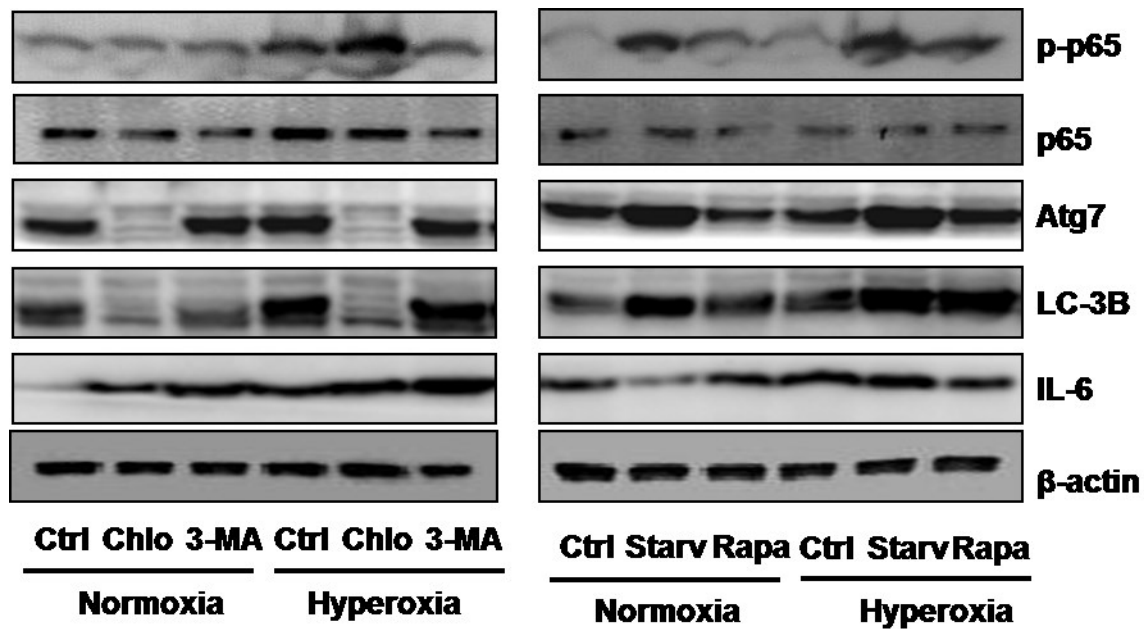

**Figure S1. Autophagy is involved inflammatory responses under hyperoxia.** Cells were starved for 4 h or pre-treated with rapamycin (10 nM) for 12 h, 3-methyladenine (3-MA) (5 mM) for 3 h and chloroquine (20  $\mu$ M) for 6 h before hyperoxia exposure. After 6 h hyperoxia exposure, cells were collected to detect the expressions of cytokines, NF- $\kappa$ B as well as autophagy markers.

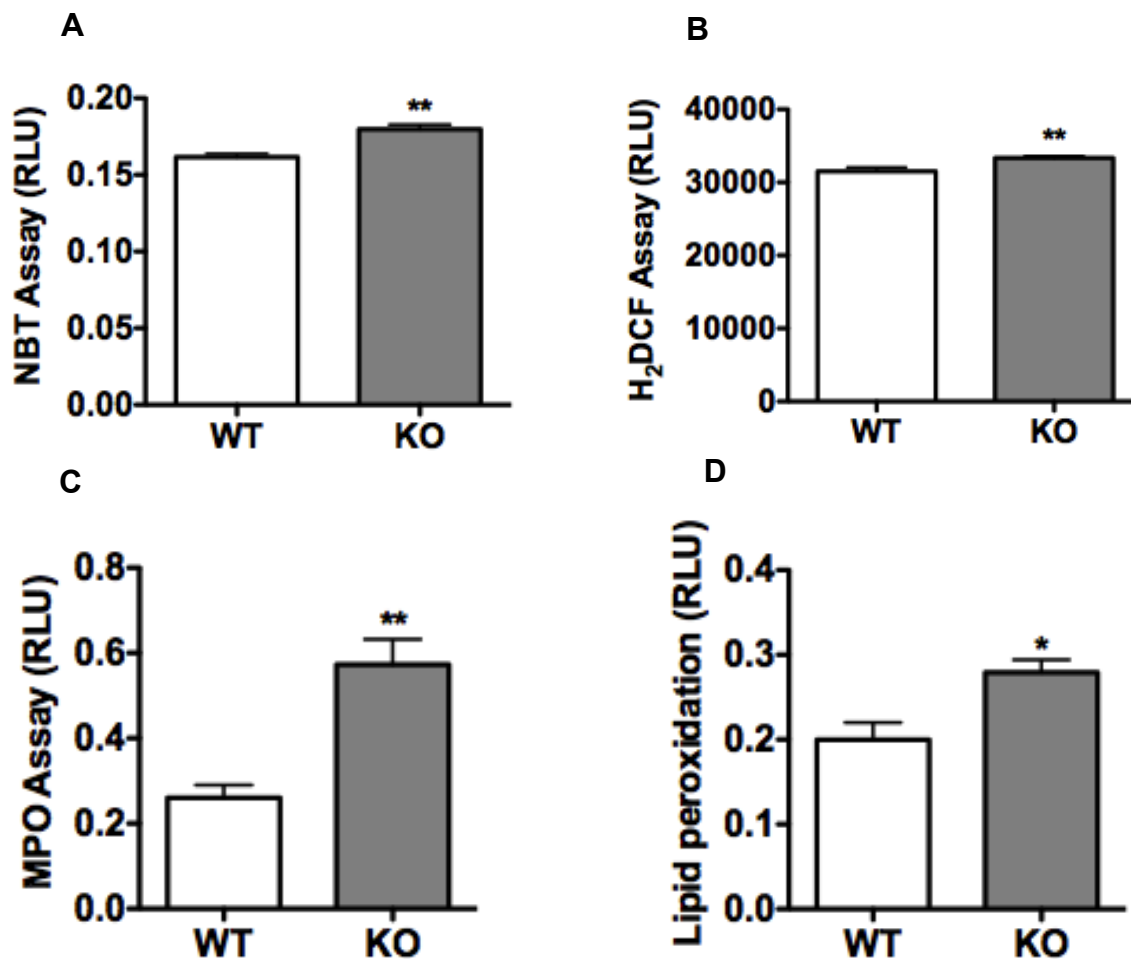

**Figure S2. Increased oxidative stress in the lungs of *ogg1* KO mice.** (A) Superoxide production of AM cells was significantly increased in *ogg1* KO mice compared to that of WT mice using NBT assay (1  $\mu$ g/ml) at 560 nm. (B) Oxidative stress was increased in *ogg1* KO mice as determined by an H<sub>2</sub>DCF assay (5  $\mu$ M) at 485 nm. Increased MPO activity (C) and lipid peroxidation (D) were observed in *ogg1* KO mice. *ogg1* KO mice and WT mice were exposed to hyperoxia for 48 h. Data were representative of three experiments (student t-test, \* $p$ < 0.05, \*\* $p$ < 0.01).

**A**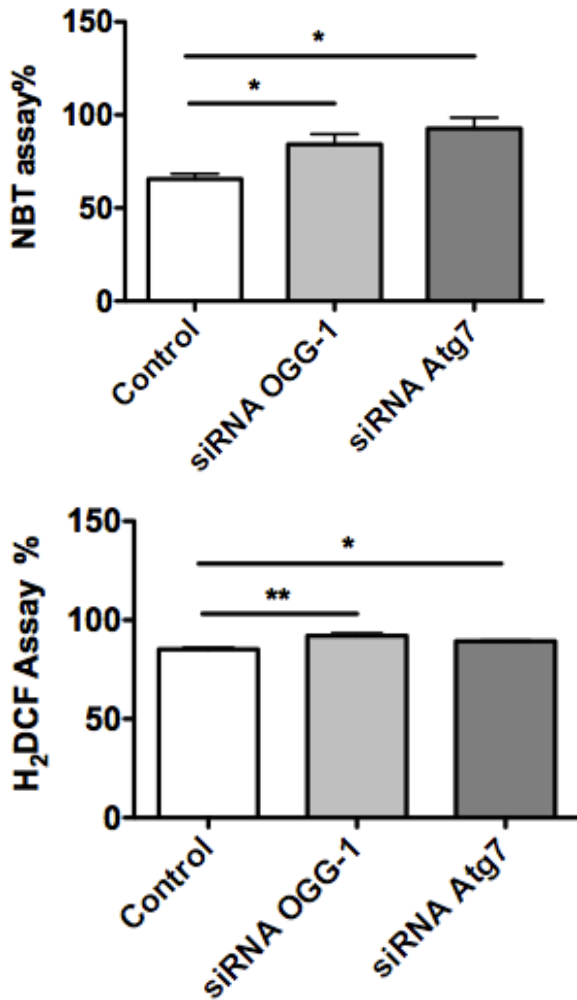**B**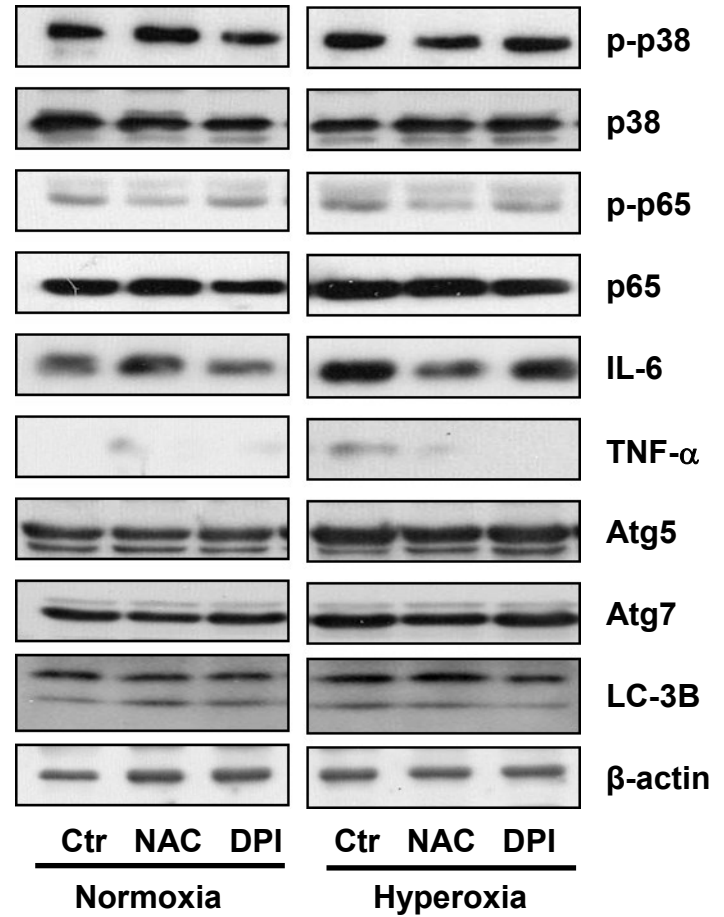

**Figure S3. ROS plays a role in regulating inflammatory responses.** (A) Increased ROS production in Atg7 or OGG1 silencing cells determined by NBT and H<sub>2</sub>DCF assay. (B) Increased expression of cytokines and NF-κB was significantly blocked by ROS inhibitors by immunoblotting analysis. Cells were pretreated with diphenylene iodonium (DPI) (10 μM) and N-acetylcysteine (NAC) (5 μM) for 16 h, respectively, followed by 6 h hyperoxia exposure. Data were representative of three experiments (student t-test, \* p < 0.05; \*\*p < 0.01).

**Supplementary Table 1. Primers of Atg7 gene.**

| <b>ID</b>              | <b>Primer Sequences (5'-3')</b>           |
|------------------------|-------------------------------------------|
| Atg7_CpG_ChIP_F        | AAGTTGAGCGGCGGTAAGTAA                     |
| Atg7_CpG_ChIP_R        | AGGCAGCACTTCACAGAATGA                     |
| Atg7_upstream_ChIP_F   | GAT GCG GTA TCA GGA TGC TT                |
| Atg7_upstream_ChIP_R   | GTG GAT CTG TGA GTA GTG AGT               |
| Atg7_downstream_ChIP_F | ACA CAT AGC CGG GCA CAG                   |
| Atg7_downstream_ChIP_R | AGTTGGCCTCACCACTGTG                       |
| Atg7 luci-reporter F   | <u>CGGGGTACCCCG</u> GCTTACAGGTTAGCCTTAGTT |
| Atg7 luci-reporter R   | <u>TCCCCCGGGGGA</u> AGGCAGCACTTCACAGAATGA |
